# Supplementary material for: Secreted IgM deficiency leads to increased BCR signaling that results in abnormal splenic B cell development
Source: PubMed Central journal article supplement (PMC5471202; doi:10.1038/s41598-017-03688-8), 2017-06-14
Supplement: 41598_2017_3688_MOESM1_ESM.pdf [file 41598_2017_3688_MOESM1_ESM.pdf]

# **Secreted IgM deficiency leads to increased BCR signaling that results in abnormal splenic B cell development**

Dimitrios Tsiantoulas<sup>1,2,\*</sup>, Mate Kiss<sup>1,2</sup>, Barbara Bartolini-Gritti<sup>1,2</sup>, Andreas Bergthaler<sup>1</sup>, Ziad Mallat<sup>3</sup>, Hassan Jumaa<sup>4</sup>, Christoph J. Binder<sup>1,2,\*</sup>

## Supplementary Materials

Figure S1

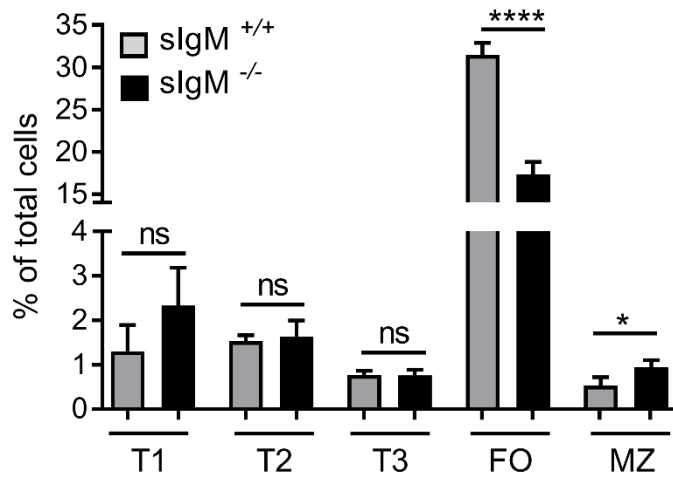

**Figure S1. Secreted IgM deficiency results in altered splenic mature B cell development.** Bar graph shows T1 (B220<sup>+</sup>IgM<sup>+</sup>CD93<sup>+</sup>CD21<sup>low</sup>CD23<sup>-</sup>), T2 (B220<sup>+</sup>IgM<sup>high</sup>CD93<sup>+</sup>CD21<sup>+</sup>CD23<sup>+</sup>), T3 (B220<sup>+</sup>IgM<sup>+</sup>CD93<sup>+</sup>CD21<sup>+</sup>CD23<sup>+</sup>), FO (B220<sup>+</sup>IgM<sup>+</sup>CD93<sup>-</sup>CD21<sup>high</sup>CD23<sup>+</sup>) and MZ (B220<sup>+</sup>IgM<sup>+</sup>CD93<sup>-</sup>CD21<sup>high</sup>CD23<sup>-</sup>) B cells of *slgM*<sup>+/+</sup> (grey bars) and *slgM*<sup>-/-</sup> (black bars) mice (n=4 mice per group). Data are shown as mean  $\pm$  SEM and are representative of two independent experiments. (unpaired t test; \* P<0.05, \*\*\*\* P<0.0001).

Figures S2

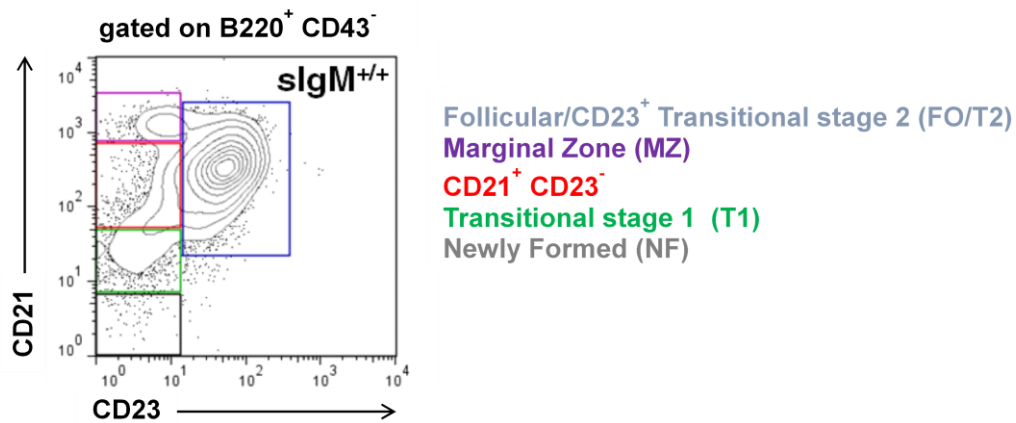

**Figures S2. Flow cytometry gating strategy of splenic B cells.**

Splenic B cell subsets: follicular and CD23<sup>+</sup> transitional stage 2 B cells (FO/T2; blue) are defined as B220<sup>+</sup>CD21<sup>+</sup>CD23<sup>+</sup>CD43<sup>-</sup>, marginal zone (MZ; purple) B cells as B220<sup>+</sup>CD21<sup>high</sup>CD23<sup>-</sup>CD43<sup>-</sup>, CD21<sup>+</sup>CD23<sup>-</sup> B cells as B220<sup>+</sup>CD21<sup>+</sup>CD23<sup>-</sup>CD43<sup>-</sup> (red), transitional stage 1 (T1; green) B cells as B220<sup>+</sup>CD21<sup>low</sup>CD23<sup>-</sup>CD43<sup>-</sup> and newly formed (NF; grey) B cells as B220<sup>+</sup>CD21<sup>-</sup>CD23<sup>-</sup>CD43<sup>-</sup>. To assess only FO B cells, CD21<sup>high</sup>CD23<sup>+</sup> B cells were excluded from the gate (not shown).
